# Supplementary material for: Validation of the 2021 FIGO staging schema for advanced vulvar cancer
Source: HighWire-hosted journal article supplement (doi:10.1136/ijgc-2021-003168), 2022-01-07
Supplement: ijgc-2021-003168supp001_data_supplement.pdf [file ijgc-2021-003168supp001_data_supplement.pdf]

**Supplemental Figure S1. Study selection schema.**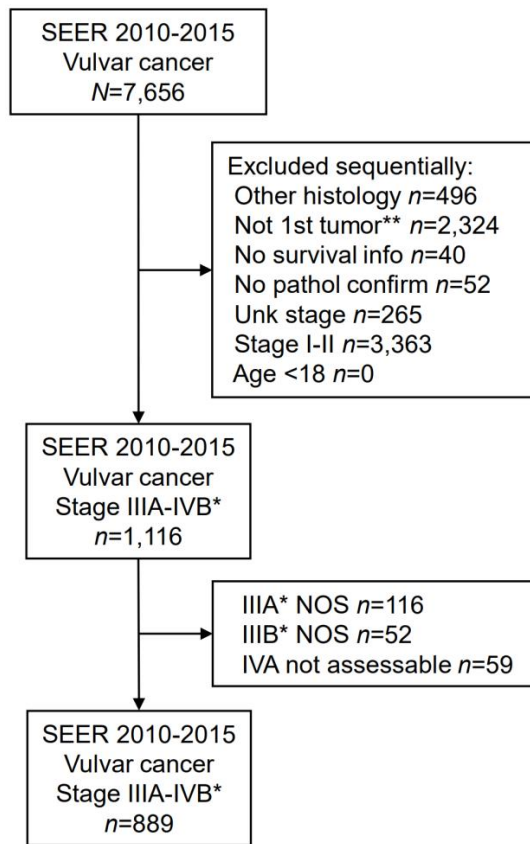

\*Stage per the 2009 FIGO staging schema of vulvar cancer. \*\*including secondary primary cancer.

**Supplemental Table S1. 2021 FIGO cancer staging schema for advanced vulvar cancer.**

| Stage | Tumor extension <sup>†</sup>                                                    |
|-------|---------------------------------------------------------------------------------|
| IIIA  | Upper 2/3 urethra or vagina; bladder or rectal mucosa; regional nodal mets ≤5mm |
| IIIB  | Regional nodal mets >5mm                                                        |
| IIIC  | Regional nodal mets with extra-capsular spread                                  |
| IVA   | Fixed to pelvic bone; fixed or ulcerated regional nodal mets                    |
| IVB   | Distant metastases                                                              |

\*upper urethral, vaginal mucosa, bladder mucosa, or rectal mucosal invasion.

\*\*fixed to pelvic bone.

†Adopted and modified the original description.<sup>5</sup>

**Supplemental Table S2. AJCC 7th edition to FIGO stage.**

| T    | N   | M  | 2009 FIGO | 2021 FIGO    |
|------|-----|----|-----------|--------------|
| T1-2 | N1a | M0 | IIIA2     | IIIA         |
| T1-2 | N1b | M0 | IIIA2     | IIIB         |
| T1-2 | N2a | M0 | IIIB2     | IIIA         |
| T1-2 | N2b | M0 | IIIB1     | IIIB         |
| T1-2 | N2c | M0 | IIIC      | IIIC         |
| T3   | -   | M0 | IVA1      | IIIA or IVA* |
| -    | N3  | M0 | IVA2      | IVA          |
| -    | -   | M1 | IVB       | IVB          |

\*CS extension was used to assess the tumor extension for T3 cases. Definition: N1a, 1-2 nodal metastasis (<5mm); N1b, 1 nodal metastasis (≥5mm); N2a, ≥3 nodal metastasis (<5mm); N2b, ≥2 nodal metastasis (≥5mm); and N2c, nodal metastasis with extra-capsule extension.

**Supplemental Table S3. Inter-stage comparison (overall survival) per the 2009 FIGO staging schema.**

|      | IIIA | IIIB  | IIIC   | IVA    | IVB    |
|------|------|-------|--------|--------|--------|
| IIIA |      | 0.347 | <0.001 | <0.001 | <0.001 |
| IIIB |      |       | 0.004  | <0.001 | <0.001 |
| IIIC |      |       |        | 0.377  | <0.001 |
| IVA  |      |       |        |        | <0.001 |
| IVB  |      |       |        |        |        |

P-values are shown (log-rank test). Green color indicates statistically non-significant association between the two stage groups. Survival curves are shown in Figure 2A.

**Supplemental Table S4. Inter-stage comparison (overall survival) per the 2021 FIGO staging schema.**

|      | IIIA | IIIB  | IIIC   | IVA    | IVB    |
|------|------|-------|--------|--------|--------|
| IIIA |      | 0.997 | <0.001 | <0.001 | <0.001 |
| IIIB |      |       | <0.001 | <0.001 | <0.001 |
| IIIC |      |       |        | 0.006  | <0.001 |
| IVA  |      |       |        |        | 0.221  |
| IVB  |      |       |        |        |        |

P-values are shown (log-rank test). Green color indicates statistically non-significant association between the two stage groups. Survival curves are shown in Figure 2B.
